# Supplementary material
Source: PubMed Central journal article supplement (PMC7788336)
Supplement: NIHMS1651691-supplement-Supplement.pdf [file NIHMS1651691-supplement-Supplement.pdf]

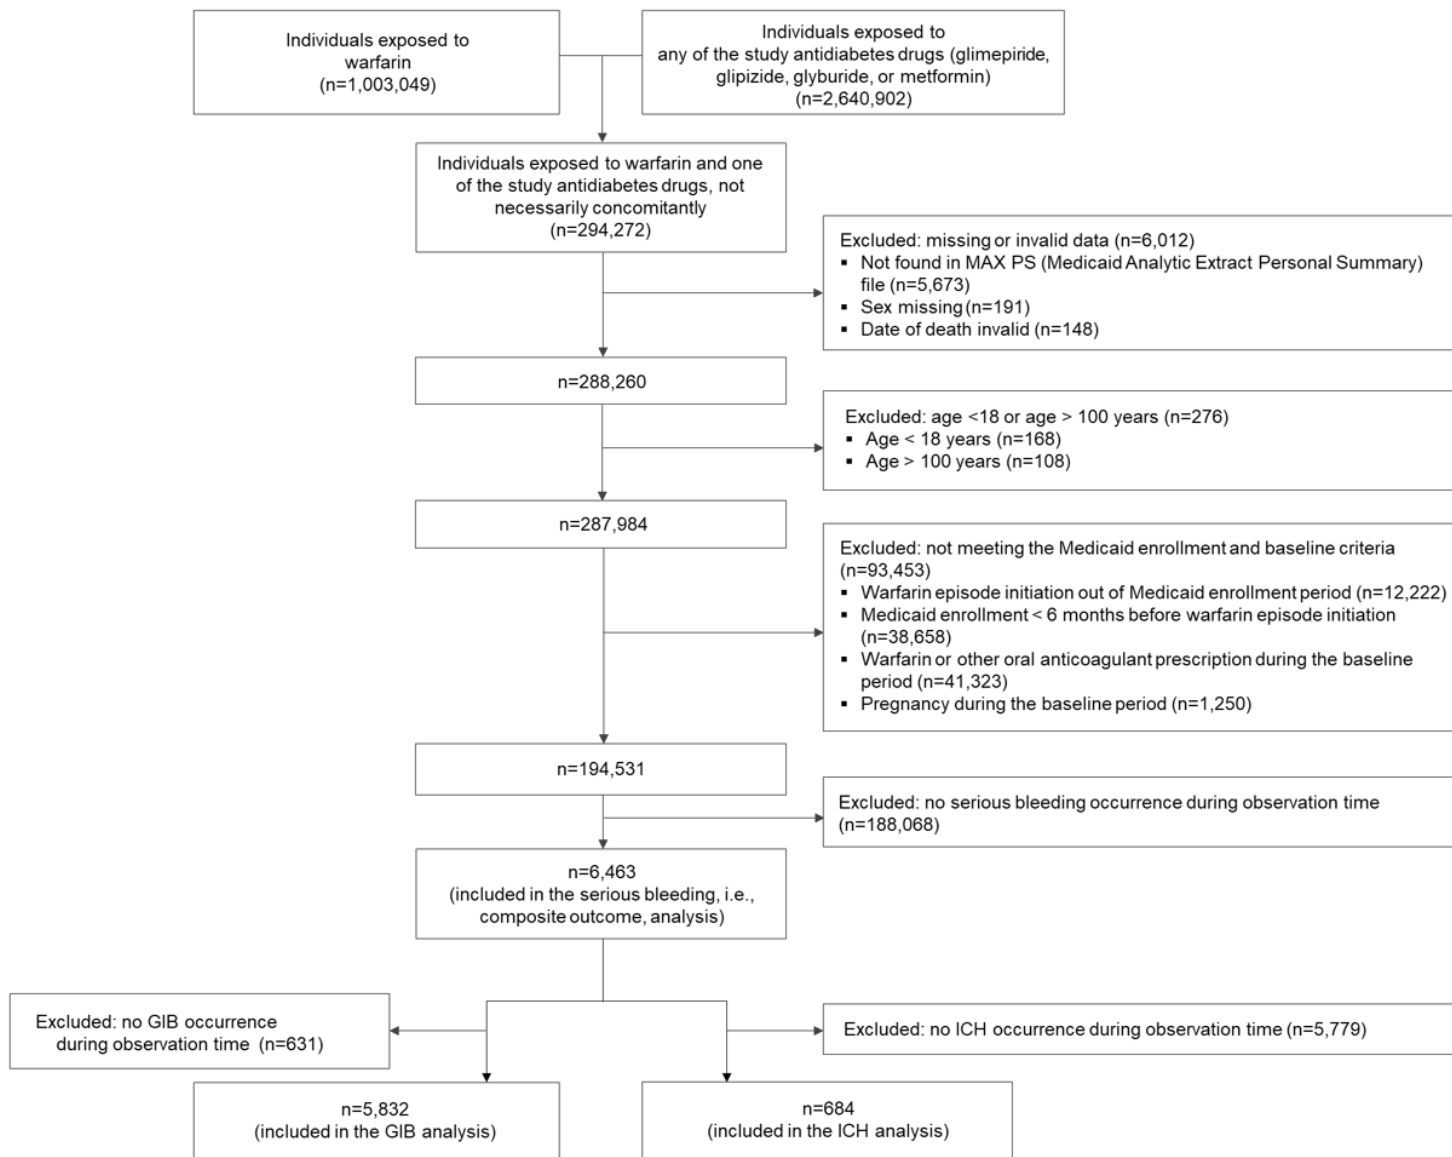

**Figure S1. Identification of study individuals and application of inclusion and exclusion criteria**

GIB: gastrointestinal bleeding. ICH: non-traumatic intracranial hemorrhage.

**Table S1. ICD-9-CM diagnosis codes used to identify acute infections**

| ICD-9-CM code                   | Description                                                                    |
|---------------------------------|--------------------------------------------------------------------------------|
| 001.*                           | Cholera                                                                        |
| 002.*                           | Typhoid and paratyphoid fevers                                                 |
| 003.*                           | Other salmonella infections                                                    |
| 004.*                           | Shigellosis                                                                    |
| 005.*                           | Other food poisoning (bacterial)                                               |
| 006.*, except 006.1             | Amebiasis                                                                      |
| 007.*                           | Other protozoal intestinal diseases                                            |
| 008.*                           | Intestinal infections due to other organisms                                   |
| 009.*                           | Ill-defined intestinal infections                                              |
| 018.0*                          | Miliary tuberculosis                                                           |
| 020.*                           | Plague                                                                         |
| 021.*                           | Tularemia                                                                      |
| 022.*                           | Anthrax                                                                        |
| 023.*                           | Brucellosis                                                                    |
| 024                             | Glanders                                                                       |
| 025                             | Melioidosis                                                                    |
| 026.*                           | Rat-bite fever                                                                 |
| 027.*                           | Other zoonotic bacterial diseases                                              |
| 030.*                           | Leprosy                                                                        |
| 031.*                           | Diseases due to other mycobacteria                                             |
| 032.*                           | Diphtheria                                                                     |
| 033.*                           | Whooping cough                                                                 |
| 034.*                           | Streptococcal sore throat and scarlet fever                                    |
| 035                             | Erysipelas                                                                     |
| 036.*                           | Meningococcal infection                                                        |
| 037                             | Tetanus                                                                        |
| 038.*                           | Septicemia                                                                     |
| 039.*, except 039.4             | Actinomycotic infections                                                       |
| 040.*, except 040.1             | Other bacterial diseases                                                       |
| 041.*, except 041.81            | Bacterial infection in conditions classified elsewhere and of unspecified site |
| 045.*                           | Acute poliomyelitis                                                            |
| 047.*                           | Meningitis due to enterovirus                                                  |
| 048                             | Other enterovirus diseases of central nervous system                           |
| 049.*                           | Other non-arthropod-borne viral diseases of central nervous system             |
| 050.*                           | Smallpox                                                                       |
| 051.*                           | Cowpox and paravaccinia                                                        |
| 052.*                           | Chickenpox                                                                     |
| 053.*, except 053.12,<br>053.13 | Herpes zoster                                                                  |
| 054.*                           | Herpes simplex                                                                 |
| 055.*                           | Measles                                                                        |
| 056.*                           | Rubella                                                                        |
| 057.*                           | Other viral exanthemata                                                        |
| 058.*                           | Other human herpesvirus                                                        |
| 059.*                           | Other poxvirus infections                                                      |
| 060.*                           | Yellow fever                                                                   |
| 061                             | Dengue                                                                         |
| 062.*                           | Mosquito-borne viral encephalitis                                              |
| 063.*                           | Tick-borne viral encephalitis                                                  |
| 064                             | Viral encephalitis transmitted by other and unspecified arthropods             |

| ICD-9-CM code                                                      | Description                                                                               |
|--------------------------------------------------------------------|-------------------------------------------------------------------------------------------|
| 065.*                                                              | Arthropod-borne hemorrhagic fever                                                         |
| 066.*                                                              | Other arthropod-borne viral diseases                                                      |
| 070.*, except 070.22,<br>070.23, 070.32, 070.33,<br>070.44, 070.54 | Viral hepatitis                                                                           |
| 071                                                                | Rabies                                                                                    |
| 072.*                                                              | Mumps                                                                                     |
| 073.*                                                              | Ornithosis                                                                                |
| 074.*                                                              | Specific diseases due to coxsackie virus                                                  |
| 075                                                                | Infectious mononucleosis                                                                  |
| 076.*                                                              | Trachoma                                                                                  |
| 077.*                                                              | Other diseases of conjunctiva due to viruses and chlamydiae                               |
| 078.*                                                              | Other diseases due to viruses and chlamydiae                                              |
| 079.*, except 079.51,<br>079.52, 079.53                            | Viral and chlamydial infection in conditions classified elsewhere and of unspecified site |
| 080                                                                | Louse-borne (epidemic) typhus                                                             |
| 081.*                                                              | Other typhus                                                                              |
| 082.*                                                              | Tick-borne rickettsioses                                                                  |
| 083.*                                                              | Other rickettsioses                                                                       |
| 084.*                                                              | Malaria                                                                                   |
| 085.*                                                              | Leishmaniasis                                                                             |
| 086.*                                                              | Trypanosomiasis                                                                           |
| 087.*                                                              | Relapsing fever                                                                           |
| 088.*                                                              | Other arthropod-borne diseases                                                            |
| 090.*                                                              | Congenital syphilis                                                                       |
| 091.*                                                              | Early syphilis symptomatic                                                                |
| 092.*                                                              | Early syphilis latent                                                                     |
| 093.*                                                              | Cardiovascular syphilis                                                                   |
| 094.*                                                              | Neurosyphilis                                                                             |
| 095.*                                                              | Other forms of late syphilis with symptoms                                                |
| 096                                                                | Late syphilis, latent                                                                     |
| 097.*                                                              | Other and unspecified syphilis                                                            |
| 098.*, except 098.2,<br>098.3*                                     | Gonococcal infections                                                                     |
| 099.*                                                              | Other venereal diseases                                                                   |
| 100.*                                                              | Leptospirosis                                                                             |
| 101                                                                | Vincent's angina                                                                          |
| 103.*                                                              | Pinta                                                                                     |
| 104.*                                                              | Other spirochetal infection                                                               |
| 110.*                                                              | Dermatophytosis                                                                           |
| 111.*                                                              | Dermatomycosis other and unspecified                                                      |
| 112.*                                                              | Candidiasis                                                                               |
| 114.*, except 114.4                                                | Coccidioidomycosis                                                                        |
| 115.*                                                              | Histoplasmosis                                                                            |
| 116.*, except 116.2                                                | Blastomycotic infection                                                                   |
| 118                                                                | Opportunistic mycoses                                                                     |
| 121.*                                                              | Other trematode infections                                                                |
| 122.*                                                              | Echinococcosis                                                                            |
| 123.*                                                              | Other cestode infection                                                                   |
| 124                                                                | Trichinosis                                                                               |
| 125.*                                                              | Filarial infection and dracontiasis                                                       |

| ICD-9-CM code       | Description                                                         |
|---------------------|---------------------------------------------------------------------|
| 126.*               | Ancylostomiasis and necatoriasis                                    |
| 127.*               | Other intestinal helminthiases                                      |
| 128.*               | Other and unspecified helminthiases                                 |
| 129                 | Intestinal parasitism, unspecified                                  |
| 130.*               | Toxoplasmosis                                                       |
| 131.*               | Trichomoniasis                                                      |
| 132.*               | Pediculosis and phthirus infestation                                |
| 133.*               | Acariasis                                                           |
| 134.*               | Other infestation                                                   |
| 135                 | Sarcoidosis                                                         |
| 136.*               | Other and unspecified infectious and parasitic diseases             |
| 320.*               | Bacterial meningitis                                                |
| 321.*               | Meningitis due to other organisms                                   |
| 322.*               | Meningitis of unspecified cause                                     |
| 323.*               | Encephalitis myelitis and encephalomyelitis                         |
| 460                 | Acute nasopharyngitis [common cold]                                 |
| 461.*               | Acute sinusitis                                                     |
| 462                 | Acute pharyngitis                                                   |
| 463                 | Acute tonsillitis                                                   |
| 464.*               | Acute laryngitis and tracheitis                                     |
| 465.*               | Acute upper respiratory infections of multiple or unspecified sites |
| 466.*               | Acute bronchitis and bronchiolitis                                  |
| 480.*               | Viral pneumonia                                                     |
| 481                 | Pneumococcal pneumonia [Streptococcus pneumoniae pneumonia]         |
| 482.*               | Other bacterial pneumonia                                           |
| 483.*, except 483.0 | Pneumonia due to other specified organism                           |
| 484.*               | Pneumonia in infectious diseases classified elsewhere               |
| 485                 | Bronchopneumonia, organism unspecified                              |
| 486                 | Pneumonia, organism unspecified                                     |
| 487.*               | Influenza                                                           |
| 488.*               | Influenza due to certain identified influenza viruses               |
| 590.1*              | Acute pyelonephritis                                                |
| 595.0               | Acute cystitis                                                      |
| 598.0*              | Urethral stricture due to infection                                 |
| 599.0               | Urinary tract infection, site not specified                         |

**Table S2. Sensitivity analysis: Confounder-adjusted outcome occurrence rate ratios for the association between serious bleeding and warfarin when used concomitantly with a sulfonylurea or metformin, controlling for warfarin average daily dose**

| Outcome                               | Person-days during observation time | Number of outcomes during observation time | Precipitant drug | Person-days during precipitant-exposed time <sup>a</sup> | Number of outcomes during precipitant-exposed time | Rate ratio <sup>b</sup> | 95% CI     |
|---------------------------------------|-------------------------------------|--------------------------------------------|------------------|----------------------------------------------------------|----------------------------------------------------|-------------------------|------------|
| Serious bleeding <sup>c</sup>         | 1,145,524                           | 6,141                                      | glimepiride      | 79,273                                                   | 404                                                | 1.01                    | 0.80, 1.29 |
|                                       |                                     |                                            | glipizide        | 211,829                                                  | 1,079                                              | 1.00                    | 0.85, 1.18 |
|                                       |                                     |                                            | glyburide        | 148,852                                                  | 732                                                | 0.82                    | 0.68, 0.99 |
|                                       |                                     |                                            | metformin        | 305,793                                                  | 1,469                                              | 0.84                    | 0.73, 0.96 |
| Gastrointestinal bleeding             | 1,036,482                           | 5,318                                      | glimepiride      | 72,370                                                   | 358                                                | 1.13                    | 0.87, 1.46 |
|                                       |                                     |                                            | glipizide        | 192,598                                                  | 919                                                | 0.96                    | 0.81, 1.15 |
|                                       |                                     |                                            | glyburide        | 131,004                                                  | 616                                                | 0.87                    | 0.71, 1.07 |
|                                       |                                     |                                            | metformin        | 271,692                                                  | 1,236                                              | 0.90                    | 0.78, 1.04 |
| Non-traumatic intracranial hemorrhage | 118,037                             | 845                                        | glimepiride      | 7,243                                                    | 49                                                 | 0.55                    | 0.28, 1.06 |
|                                       |                                     |                                            | glipizide        | 21,872                                                   | 164                                                | 1.30                    | 0.81, 2.09 |
|                                       |                                     |                                            | glyburide        | 19,944                                                   | 120                                                | 0.56                    | 0.34, 0.92 |
|                                       |                                     |                                            | metformin        | 35,475                                                   | 239                                                | 0.51                    | 0.35, 0.74 |

CI: confidence interval (based on a two-tailed test). <sup>a</sup>Precipitant-exposed time: days of warfarin-precipitant drug concomitant use during observation time since the initiation of the concomitant use. <sup>b</sup>Rate ratio: [(outcome occurrence rate during precipitant-exposed time) / (outcome occurrence rate during precipitant-unexposed time)], for each warfarin-precipitant drug pair. <sup>c</sup>Serious bleeding as a composite outcome; occurrence of gastrointestinal bleeding or non-traumatic intracranial hemorrhage or both.

**Table S3. Sensitivity analysis: Confounder-adjusted outcome occurrence rate ratios for the association between serious bleeding and warfarin when used concomitantly with a sulfonylurea or metformin, controlling for warfarin monitoring**

| Outcome                               | Person-days during observation time | Number of outcomes during observation time | Precipitant drug | Person-days during precipitant-exposed time <sup>a</sup> | Number of outcomes during precipitant-exposed time | Rate ratio <sup>b</sup> | 95% CI     |
|---------------------------------------|-------------------------------------|--------------------------------------------|------------------|----------------------------------------------------------|----------------------------------------------------|-------------------------|------------|
| Serious bleeding <sup>c</sup>         | 1,433,447                           | 7,388                                      | glimepiride      | 101,700                                                  | 496                                                | 0.93                    | 0.75, 1.15 |
|                                       |                                     |                                            | glipizide        | 259,066                                                  | 1,276                                              | 0.97                    | 0.83, 1.12 |
|                                       |                                     |                                            | glyburide        | 183,101                                                  | 913                                                | 0.89                    | 0.75, 1.05 |
|                                       |                                     |                                            | metformin        | 385,586                                                  | 1,757                                              | 0.85                    | 0.75, 0.96 |
| Gastrointestinal bleeding             | 1,303,047                           | 6,419                                      | glimepiride      | 92,882                                                   | 441                                                | 0.98                    | 0.78, 1.24 |
|                                       |                                     |                                            | glipizide        | 236,553                                                  | 1,090                                              | 0.96                    | 0.82, 1.12 |
|                                       |                                     |                                            | glyburide        | 162,723                                                  | 756                                                | 0.88                    | 0.74, 1.06 |
|                                       |                                     |                                            | metformin        | 343,808                                                  | 1,487                                              | 0.91                    | 0.80, 1.04 |
| Non-traumatic intracranial hemorrhage | 141,179                             | 996                                        | glimepiride      | 9,457                                                    | 58                                                 | 0.67                    | 0.36, 1.26 |
|                                       |                                     |                                            | glipizide        | 25,667                                                   | 191                                                | 1.01                    | 0.68, 1.51 |
|                                       |                                     |                                            | glyburide        | 22,488                                                   | 161                                                | 0.81                    | 0.52, 1.26 |
|                                       |                                     |                                            | metformin        | 43,526                                                   | 276                                                | 0.50                    | 0.36, 0.70 |

CI: confidence interval (based on a two-tailed test). <sup>a</sup>Precipitant-exposed time: days of warfarin-precipitant drug concomitant use during observation time since the initiation of the concomitant use. <sup>b</sup>Rate ratio: [(outcome occurrence rate during precipitant-exposed time) / (outcome occurrence rate during precipitant-unexposed time)], for each warfarin-precipitant drug pair. <sup>c</sup>Serious bleeding as a composite outcome; occurrence of gastrointestinal bleeding or non-traumatic intracranial hemorrhage or both.

**Table S4. Sensitivity analysis: Confounder-adjusted outcome occurrence rate ratios for the association between serious bleeding and warfarin when used concomitantly with a sulfonyleurea or metformin, with observation time only from individuals who were alive during that observation time**

| Outcome                               | Person-days during observation time | Number of outcomes during observation time | Precipitant drug | Person-days during precipitant-exposed time <sup>a</sup> | Number of outcomes during precipitant-exposed time | Rate ratio <sup>b</sup> | 95% CI     |
|---------------------------------------|-------------------------------------|--------------------------------------------|------------------|----------------------------------------------------------|----------------------------------------------------|-------------------------|------------|
| Serious bleeding <sup>c</sup>         | 1,312,744                           | 6,420                                      | glimepiride      | 90,841                                                   | 428                                                | 1.02                    | 0.80, 1.29 |
|                                       |                                     |                                            | glipizide        | 235,160                                                  | 1,052                                              | 0.94                    | 0.80, 1.10 |
|                                       |                                     |                                            | glyburide        | 167,117                                                  | 799                                                | 0.93                    | 0.77, 1.11 |
|                                       |                                     |                                            | metformin        | 353,794                                                  | 1,535                                              | 0.87                    | 0.76, 0.99 |
| Gastrointestinal bleeding             | 1,205,234                           | 5,784                                      | glimepiride      | 84,518                                                   | 397                                                | 0.95                    | 0.75, 1.22 |
|                                       |                                     |                                            | glipizide        | 215,850                                                  | 955                                                | 0.97                    | 0.82, 1.15 |
|                                       |                                     |                                            | glyburide        | 150,026                                                  | 683                                                | 0.91                    | 0.75, 1.10 |
|                                       |                                     |                                            | metformin        | 319,827                                                  | 1,357                                              | 0.92                    | 0.80, 1.05 |
| Non-traumatic intracranial hemorrhage | 99,936                              | 652                                        | glimepiride      | 5,472                                                    | 32                                                 | 2.42                    | 0.99, 5.91 |
|                                       |                                     |                                            | glipizide        | 18,459                                                   | 100                                                | 0.74                    | 0.47, 1.16 |
|                                       |                                     |                                            | glyburide        | 16,193                                                   | 118                                                | 1.02                    | 0.61, 1.69 |
|                                       |                                     |                                            | metformin        | 30,462                                                   | 181                                                | 0.49                    | 0.33, 0.73 |

CI: confidence interval (based on a two-tailed test). <sup>a</sup>Precipitant-exposed time: days of warfarin-precipitant drug concomitant use during observation time since the initiation of the concomitant use. <sup>b</sup>Rate ratio: [(outcome occurrence rate during precipitant-exposed time) / (outcome occurrence rate during precipitant-unexposed time)], for each warfarin-precipitant drug pair. <sup>c</sup>Serious bleeding as a composite outcome; occurrence of gastrointestinal bleeding or non-traumatic intracranial hemorrhage or both.

Number of person-days excluded: Serious bleeding, 120,703 person-days; Gastrointestinal bleeding, 97,813 person-days; Non-traumatic intracranial hemorrhage, 41,243 person-days.

**Table S5. Sensitivity analysis: Confounder-adjusted outcome occurrence rate ratios for the association between serious bleeding and warfarin when used concomitantly with a sulfonylurea or metformin, excluding individuals with potentially incomplete data**

| Outcome                               | Person-days during observation time | Number of outcomes during observation time | Precipitant drug | Person-days during precipitant-exposed time <sup>a</sup> | Number of outcomes during precipitant-exposed time | Rate ratio <sup>b</sup> | 95% CI     |
|---------------------------------------|-------------------------------------|--------------------------------------------|------------------|----------------------------------------------------------|----------------------------------------------------|-------------------------|------------|
| Serious bleeding <sup>c</sup>         | 790,061                             | 4,399                                      | glimepiride      | 56,059                                                   | 295                                                | 1.02                    | 0.77, 1.36 |
|                                       |                                     |                                            | glipizide        | 136,046                                                  | 741                                                | 0.91                    | 0.75, 1.11 |
|                                       |                                     |                                            | glyburide        | 96,773                                                   | 562                                                | 0.88                    | 0.70, 1.09 |
|                                       |                                     |                                            | metformin        | 199,242                                                  | 996                                                | 0.90                    | 0.76, 1.05 |
| Gastrointestinal bleeding             | 719,129                             | 3,797                                      | glimepiride      | 52,950                                                   | 263                                                | 1.02                    | 0.76, 1.37 |
|                                       |                                     |                                            | glipizide        | 124,653                                                  | 635                                                | 0.91                    | 0.74, 1.12 |
|                                       |                                     |                                            | glyburide        | 84,337                                                   | 461                                                | 0.92                    | 0.73, 1.16 |
|                                       |                                     |                                            | metformin        | 177,671                                                  | 825                                                | 0.96                    | 0.81, 1.14 |
| Non-traumatic intracranial hemorrhage | 78,706                              | 618                                        | glimepiride      | 3,748                                                    | 35                                                 | 0.93                    | 0.34, 2.57 |
|                                       |                                     |                                            | glipizide        | 13,252                                                   | 108                                                | 0.80                    | 0.46, 1.40 |
|                                       |                                     |                                            | glyburide        | 14,136                                                   | 103                                                | 0.61                    | 0.34, 1.10 |
|                                       |                                     |                                            | metformin        | 22,289                                                   | 174                                                | 0.52                    | 0.33, 0.83 |

CI: confidence interval (based on a two-tailed test). <sup>a</sup>Precipitant-exposed time: days of warfarin-precipitant drug concomitant use during observation time since the initiation of the concomitant use. <sup>b</sup>Rate ratio: [(outcome occurrence rate during precipitant-exposed time) / (outcome occurrence rate during precipitant-unexposed time)], for each warfarin-precipitant drug pair. <sup>c</sup>Serious bleeding as a composite outcome; occurrence of gastrointestinal bleeding or non-traumatic intracranial hemorrhage or both.

Number of person-days excluded: Serious bleeding, 643,386 person-days; Gastrointestinal bleeding, 583,918 person-days; Non-traumatic intracranial hemorrhage, 62,473 person-days.
